# Supplementary material for: Photoreceptor Degeneration Accompanies Vascular Changes in a Zebrafish Model of Diabetic Retinopathy
Source: PubMed Central journal article supplement (PMC7329949; doi:10.1167/iovs.61.2.43), 2020-02-27
Supplement: iovs-61-2-43_s001.pdf [file iovs-61-2-43_s001.pdf]

## Supplemental Figures

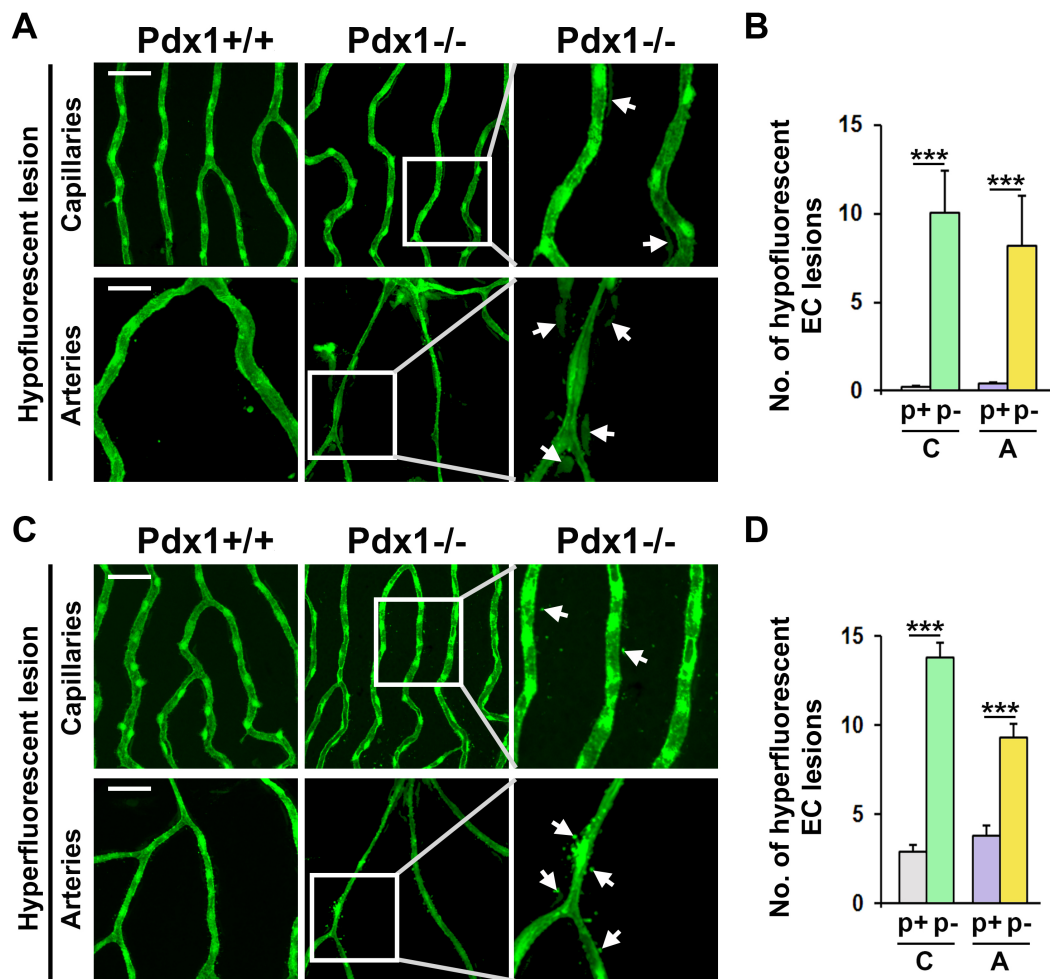

**Figure S1. *Pdx1* mutant zebrafish develop vascular lesions in the retina.**

(A, C) Confocal micrographs of retinal flat mounts from *pdx1* mutant or controls, transgenic for *fli1a:EGFP*. Hypofluorescent (A) and hyperfluorescent (C) abluminal accumulations of shedded material from the endothelium (lesions, white arrows) are apparent in the mutants but not in the controls. Size bars indicate 50  $\mu\text{m}$ . (B, D) Quantification of the number of hypo- (B) or hyperfluorescent (D) lesions in 10 regions from three individual fish per group from the experiment shown in (A, C). \*\*\*:  $p < 0.001$
