# Supplementary material for: Photoreceptor Degeneration Accompanies Vascular Changes in a Zebrafish Model of Diabetic Retinopathy
Source: PubMed Central journal article supplement (PMC7329949; doi:10.1167/iovs.61.2.43), 2020-02-27
Supplement: iovs-61-2-43_s004.pdf [file iovs-61-2-43_s004.pdf]

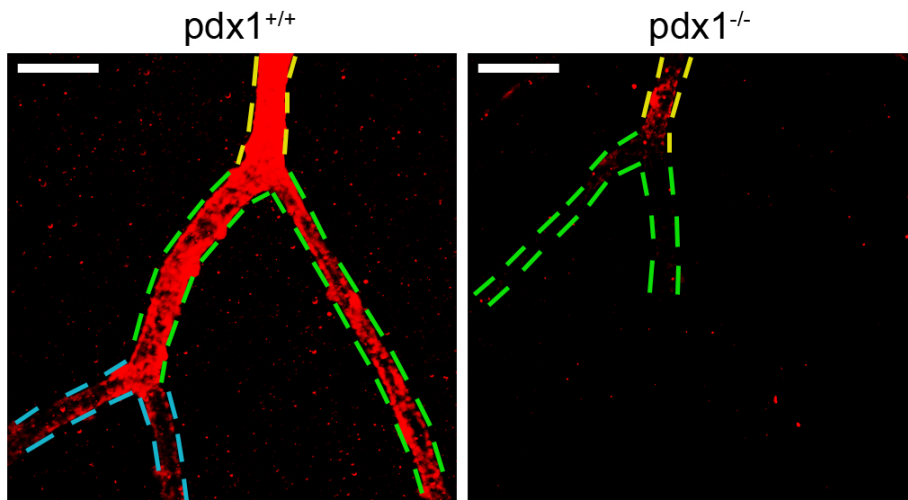

-  Primary arterial branches
-  Secondary arterial branches
-  Tertiary arterial branches

**Figure S4. Expression of Trangelin1 in vascular mural cells.** Retinal flat mounts of middle-aged (18 months old) wild type and *pdx1*<sup>-/-</sup> zebrafish stained for Trangelin1 expression (red). Primary arterial branches, secondary arterial branches and tertiary arterial branches are outlined with dashed lines in different colors as indicated. Size bars indicate 50  $\mu$ m.
